# Supplementary material
Source: Springer Nature journal article supplement (https://www.springermedizin.de/resource/supplementary/12889_2012_5905_MOESM3_ESM.pdf/9496450)

MALES

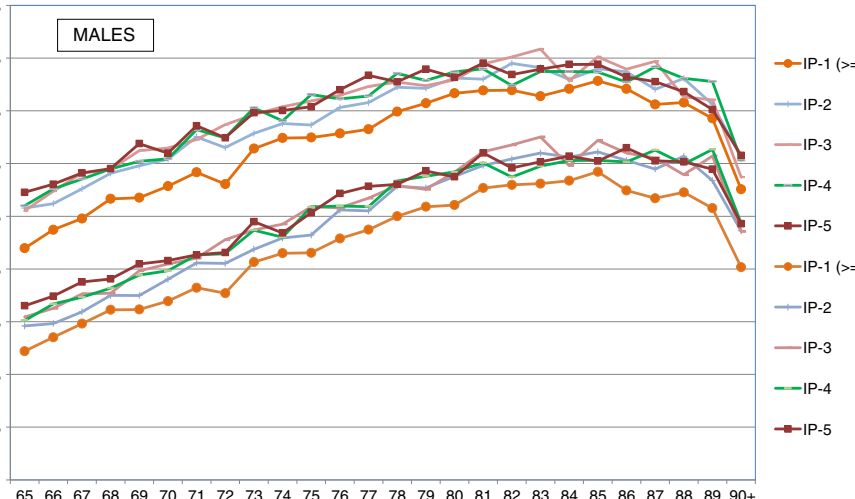

Supplement: MOESM3 [file 9496450]
